# Supplementary material for: Ab initio static and molecular dynamics study of the absorption spectra of the 4-styrylpyridine photoswitch in its cis and trans forms
Source: Royal Society of Chemistry journal article supplement (doi:10.1039/b920850j), 2010-01-01
Supplement: b920850j.pdf [file b920850j.pdf]

*Supporting Information for*

*Ab initio* static and molecular dynamics study of the absorption spectra of the 4-styrylpyridine photoswitch in its *cis* and *trans* forms

Latévi Max Lawson Daku, Jorge Linares, Marie-Laure Boillot

1 Vibrational normal coordinates and frequencies determined in the harmonic approximation for 4-styrylpyridine in the  $S_0$  ground state, and Huang-Rhys factors calculated within the displaced harmonic oscillator approximation for the structural variations induced by the  $S_0 \rightarrow S_1$  and  $S_0 \rightarrow S_2$  changes of states

1.1 *Trans*-4-styrylpyridine: vibrational analysis in the ground state and  $S_0 \rightarrow S_1$  Huang-Rhys factors (B3LYP/ $\mathcal{G}$  results)

Table S1: Vibrational normal coordinates and frequencies obtained within the harmonic approximation for *trans*-4-styrylpyridine in the  $S_0$  ground state. The  $|Q_1|$ 's are the magnitudes of the projections on the ground-state mass-weighted normal coordinates of the structural variation induced by the  $S_0 \rightarrow S_1$  change of states, the  $\mathcal{S}_1$ 's are the associated Huang-Rhys factors (B3LYP/ $\mathcal{G}$  results).

---

|                                                                                     |                                                                                      |
|-------------------------------------------------------------------------------------|--------------------------------------------------------------------------------------|
| 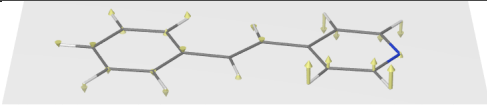 |  |
| $\nu_1(a'') = 11 \text{ cm}^{-1}$                                                   | $\nu_2(a'') = 56 \text{ cm}^{-1}$                                                    |
| $ Q_1  = 0 \text{ amu}^{1/2} \text{ \AA}$                                           | $ Q_1  = 0 \text{ amu}^{1/2} \text{ \AA}$                                            |
| $\mathcal{S}_1 = 0$                                                                 | $\mathcal{S}_1 = 0$                                                                  |

---

*To be continued ...*

---

Table S1: *continued.*

|                                                                                                                                                                                                                                      |                                                                                                                                                                                                                                |
|--------------------------------------------------------------------------------------------------------------------------------------------------------------------------------------------------------------------------------------|--------------------------------------------------------------------------------------------------------------------------------------------------------------------------------------------------------------------------------|
| 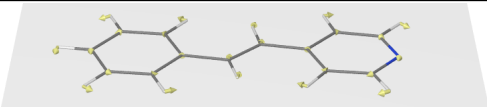 <p><math>\nu_3(a') = 78 \text{ cm}^{-1}</math><br/><math> Q_1  = 0.257 \text{ amu}^{1/2} \text{ \AA}</math><br/><math>S_1 = 0.077</math></p>       |  <p><math>\nu_4(a'') = 88 \text{ cm}^{-1}</math><br/><math> Q_1  = 0 \text{ amu}^{1/2} \text{ \AA}</math><br/><math>S_1 = 0</math></p>       |
|  <p><math>\nu_5(a') = 202 \text{ cm}^{-1}</math><br/><math> Q_1  = 0.534 \text{ amu}^{1/2} \text{ \AA}</math><br/><math>S_1 = 0.853</math></p>      |  <p><math>\nu_6(a'') = 226 \text{ cm}^{-1}</math><br/><math> Q_1  = 0 \text{ amu}^{1/2} \text{ \AA}</math><br/><math>S_1 = 0</math></p>      |
|  <p><math>\nu_7(a') = 284 \text{ cm}^{-1}</math><br/><math> Q_1  = 0.114 \text{ amu}^{1/2} \text{ \AA}</math><br/><math>S_1 = 0.055</math></p>      |  <p><math>\nu_8(a'') = 286 \text{ cm}^{-1}</math><br/><math> Q_1  = 0 \text{ amu}^{1/2} \text{ \AA}</math><br/><math>S_1 = 0</math></p>      |
|  <p><math>\nu_9(a'') = 390 \text{ cm}^{-1}</math><br/><math> Q_1  = 0 \text{ amu}^{1/2} \text{ \AA}</math><br/><math>S_1 = 0</math></p>           |  <p><math>\nu_{10}(a'') = 409 \text{ cm}^{-1}</math><br/><math> Q_1  = 0 \text{ amu}^{1/2} \text{ \AA}</math><br/><math>S_1 = 0</math></p> |
|  <p><math>\nu_{11}(a') = 469 \text{ cm}^{-1}</math><br/><math> Q_1  = 0.035 \text{ amu}^{1/2} \text{ \AA}</math><br/><math>S_1 = 0.008</math></p> |  <p><math>\nu_{12}(a'') = 485 \text{ cm}^{-1}</math><br/><math> Q_1  = 0 \text{ amu}^{1/2} \text{ \AA}</math><br/><math>S_1 = 0</math></p> |

*To be continued ...*

Table S1: *continued.*

|                                                                                                                                                                                                                                    |                                                                                                                                                                                                                                       |
|------------------------------------------------------------------------------------------------------------------------------------------------------------------------------------------------------------------------------------|---------------------------------------------------------------------------------------------------------------------------------------------------------------------------------------------------------------------------------------|
| 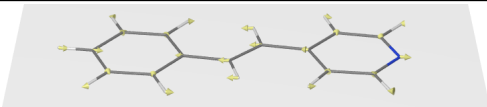 <p><math>\nu_{13}(a') = 542 \text{ cm}^{-1}</math><br/><math> Q_1  = 0.016 \text{ amu}^{1/2} \text{ \AA}</math><br/><math>S_1 = 0.002</math></p> |  <p><math>\nu_{14}(a'') = 558 \text{ cm}^{-1}</math><br/><math> Q_1  = 0 \text{ amu}^{1/2} \text{ \AA}</math><br/><math>S_1 = 0</math></p>          |
|  <p><math>\nu_{15}(a') = 623 \text{ cm}^{-1}</math><br/><math> Q_1  = 0.014 \text{ amu}^{1/2} \text{ \AA}</math><br/><math>S_1 = 0.002</math></p> |  <p><math>\nu_{16}(a') = 646 \text{ cm}^{-1}</math><br/><math> Q_1  = 0.042 \text{ amu}^{1/2} \text{ \AA}</math><br/><math>S_1 = 0.017</math></p>   |
|  <p><math>\nu_{17}(a') = 674 \text{ cm}^{-1}</math><br/><math> Q_1  = 0.010 \text{ amu}^{1/2} \text{ \AA}</math><br/><math>S_1 = 0.001</math></p> |  <p><math>\nu_{18}(a) = 702 \text{ cm}^{-1}</math><br/><math> Q_1  = 0 \text{ amu}^{1/2} \text{ \AA}</math><br/><math>S_1 = 0</math></p>            |
|  <p><math>\nu_{19}(a'') = 749 \text{ cm}^{-1}</math><br/><math> Q_1  = 0 \text{ amu}^{1/2} \text{ \AA}</math><br/><math>S_1 = 0</math></p>      |  <p><math>\nu_{20}(a'') = 774 \text{ cm}^{-1}</math><br/><math> Q_1  = 0 \text{ amu}^{1/2} \text{ \AA}</math><br/><math>S_1 = 0</math></p>        |
|  <p><math>\nu_{21}(a'') = 828 \text{ cm}^{-1}</math><br/><math> Q_1  = 0 \text{ amu}^{1/2} \text{ \AA}</math><br/><math>S_1 = 0</math></p>      |  <p><math>\nu_{22}(a') = 838 \text{ cm}^{-1}</math><br/><math> Q_1  = 0.025 \text{ amu}^{1/2} \text{ \AA}</math><br/><math>S_1 = 0.008</math></p> |

*To be continued ...*

Table S1: *continued.*

|                                                                                                                                                                                                                                        |                                                                                                                                                                                                                                            |
|----------------------------------------------------------------------------------------------------------------------------------------------------------------------------------------------------------------------------------------|--------------------------------------------------------------------------------------------------------------------------------------------------------------------------------------------------------------------------------------------|
| 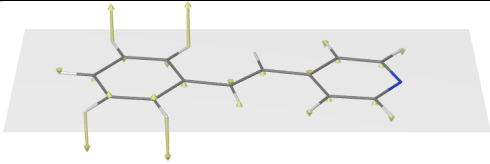 <p> <math>\nu_{23}(a'') = 853 \text{ cm}^{-1}</math><br/> <math> Q_1  = 0 \text{ amu}^{1/2} \text{ \AA}</math><br/> <math>S_1 = 0</math> </p>        |  <p> <math>\nu_{24}(a) = 877 \text{ cm}^{-1}</math><br/> <math> Q_1  = 0 \text{ amu}^{1/2} \text{ \AA}</math><br/> <math>S_1 = 0</math> </p>             |
|  <p> <math>\nu_{25}(a') = 883 \text{ cm}^{-1}</math><br/> <math> Q_1  = 0.063 \text{ amu}^{1/2} \text{ \AA}</math><br/> <math>S_1 = 0.052</math> </p> |  <p> <math>\nu_{26}(a'') = 897 \text{ cm}^{-1}</math><br/> <math> Q_1  = 0 \text{ amu}^{1/2} \text{ \AA}</math><br/> <math>S_1 = 0</math> </p>           |
|  <p> <math>\nu_{27}(a'') = 934 \text{ cm}^{-1}</math><br/> <math> Q_1  = 0 \text{ amu}^{1/2} \text{ \AA}</math><br/> <math>S_1 = 0</math> </p>       |  <p> <math>\nu_{28}(a'') = 971 \text{ cm}^{-1}</math><br/> <math> Q_1  = 0 \text{ amu}^{1/2} \text{ \AA}</math><br/> <math>S_1 = 0</math> </p>          |
|  <p> <math>\nu_{29}(a'') = 988 \text{ cm}^{-1}</math><br/> <math> Q_1  = 0 \text{ amu}^{1/2} \text{ \AA}</math><br/> <math>S_1 = 0</math> </p>      |  <p> <math>\nu_{30}(a'') = \text{cm}^{-1}</math><br/> <math> Q_1  = 995 \text{ amu}^{1/2} \text{ \AA}</math><br/> <math>S_1 = 0</math> </p>            |
|  <p> <math>\nu_{31}(a'') = 999 \text{ cm}^{-1}</math><br/> <math> Q_1  = 0 \text{ amu}^{1/2} \text{ \AA}</math><br/> <math>S_1 = 0</math> </p>      |  <p> <math>\nu_{32}(a') = 1001 \text{ cm}^{-1}</math><br/> <math> Q_1  = 0.061 \text{ amu}^{1/2} \text{ \AA}</math><br/> <math>S_1 = 0.055</math> </p> |

*To be continued ...*

Table S1: *continued.*

|                                                                                                                                                                                                                                       |                                                                                                                                                                                                                                        |
|---------------------------------------------------------------------------------------------------------------------------------------------------------------------------------------------------------------------------------------|----------------------------------------------------------------------------------------------------------------------------------------------------------------------------------------------------------------------------------------|
| 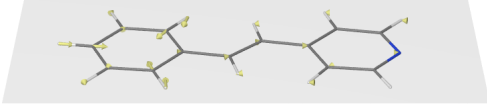 <p><math>\nu_{33}(a') = 1005 \text{ cm}^{-1}</math><br/><math> Q_1  = 0.061 \text{ amu}^{1/2} \text{ \AA}</math><br/><math>S_1 = 0.056</math></p>   |  <p><math>\nu_{34}(a'') = 1008 \text{ cm}^{-1}</math><br/><math> Q_1  = 0 \text{ amu}^{1/2} \text{ \AA}</math><br/><math>S_1 = 0</math></p>          |
|  <p><math>\nu_{35}(a') = 1046 \text{ cm}^{-1}</math><br/><math> Q_1  = 0.005 \text{ amu}^{1/2} \text{ \AA}</math><br/><math>S_1 = 0.000</math></p>   |  <p><math>\nu_{36}(a') = 1088 \text{ cm}^{-1}</math><br/><math> Q_1  = 0.018 \text{ amu}^{1/2} \text{ \AA}</math><br/><math>S_1 = 0.005</math></p>   |
|  <p><math>\nu_{37}(a') = 1101 \text{ cm}^{-1}</math><br/><math> Q_1  = 0.008 \text{ amu}^{1/2} \text{ \AA}</math><br/><math>S_1 = 0.001</math></p>   |  <p><math>\nu_{38}(a') = 1117 \text{ cm}^{-1}</math><br/><math> Q_1  = 0.017 \text{ amu}^{1/2} \text{ \AA}</math><br/><math>S_1 = 0.005</math></p>   |
|  <p><math>\nu_{39}(a') = 1181 \text{ cm}^{-1}</math><br/><math> Q_1  = 0.020 \text{ amu}^{1/2} \text{ \AA}</math><br/><math>S_1 = 0.007</math></p> |  <p><math>\nu_{40}(a') = 1200 \text{ cm}^{-1}</math><br/><math> Q_1  = 0.048 \text{ amu}^{1/2} \text{ \AA}</math><br/><math>S_1 = 0.041</math></p> |
|  <p><math>\nu_{41}(a') = 1215 \text{ cm}^{-1}</math><br/><math> Q_1  = 0.059 \text{ amu}^{1/2} \text{ \AA}</math><br/><math>S_1 = 0.063</math></p> |  <p><math>\nu_{42}(a') = 1237 \text{ cm}^{-1}</math><br/><math> Q_1  = 0.024 \text{ amu}^{1/2} \text{ \AA}</math><br/><math>S_1 = 0.011</math></p> |

*To be continued ...*

Table S1: *continued.*

|                                                                                     |                                                                                      |
|-------------------------------------------------------------------------------------|--------------------------------------------------------------------------------------|
| 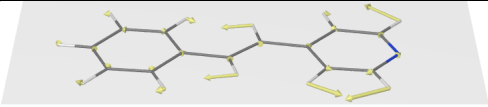   |    |
| $\nu_{43}(a') = 1252 \text{ cm}^{-1}$                                               | $\nu_{44}(a') = 1294 \text{ cm}^{-1}$                                                |
| $ Q_1  = 0.018 \text{ amu}^{1/2} \text{ \AA}$                                       | $ Q_1  = 0.001 \text{ amu}^{1/2} \text{ \AA}$                                        |
| $S_1 = 0.006$                                                                       | $S_1 = 0.000$                                                                        |
|    |    |
| $\nu_{45}(a') = 1321 \text{ cm}^{-1}$                                               | $\nu_{46}(a') = 1337 \text{ cm}^{-1}$                                                |
| $ Q_1  = 0.026 \text{ amu}^{1/2} \text{ \AA}$                                       | $ Q_1  = 0.047 \text{ amu}^{1/2} \text{ \AA}$                                        |
| $S_1 = 0.013$                                                                       | $S_1 = 0.043$                                                                        |
|    |    |
| $\nu_{47}(a') = 1357 \text{ cm}^{-1}$                                               | $\nu_{48}(a) = 1363 \text{ cm}^{-1}$                                                 |
| $ Q_1  = 0.065 \text{ amu}^{1/2} \text{ \AA}$                                       | $ Q_1  = 0.020 \text{ amu}^{1/2} \text{ \AA}$                                        |
| $S_1 = 0.085$                                                                       | $S_1 = 0.008$                                                                        |
|  |  |
| $\nu_{49}(a') = 1375 \text{ cm}^{-1}$                                               | $\nu_{50}(a') = 1448 \text{ cm}^{-1}$                                                |
| $ Q_1  = 0.034 \text{ amu}^{1/2} \text{ \AA}$                                       | $ Q_1  = 0.027 \text{ amu}^{1/2} \text{ \AA}$                                        |
| $S_1 = 0.023$                                                                       | $S_1 = 0.015$                                                                        |
|  |  |
| $\nu_{51}(a') = 1474 \text{ cm}^{-1}$                                               | $\nu_{52}(a') = 1517 \text{ cm}^{-1}$                                                |
| $ Q_1  = 0.031 \text{ amu}^{1/2} \text{ \AA}$                                       | $ Q_1  = 0.033 \text{ amu}^{1/2} \text{ \AA}$                                        |
| $S_1 = 0.021$                                                                       | $S_1 = 0.025$                                                                        |

*To be continued ...*

Table S1: *continued.*

|                                                                                                                                                                                                                                       |                                                                                                                                                                                                                                        |
|---------------------------------------------------------------------------------------------------------------------------------------------------------------------------------------------------------------------------------------|----------------------------------------------------------------------------------------------------------------------------------------------------------------------------------------------------------------------------------------|
| 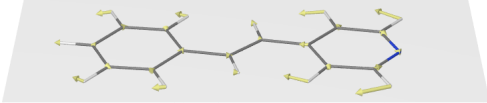 <p><math>\nu_{53}(a') = 1529 \text{ cm}^{-1}</math><br/><math> Q_1  = 0.005 \text{ amu}^{1/2} \text{ \AA}</math><br/><math>S_1 = 0.001</math></p>   |  <p><math>\nu_{54}(a') = 1597 \text{ cm}^{-1}</math><br/><math> Q_1  = 0.060 \text{ amu}^{1/2} \text{ \AA}</math><br/><math>S_1 = 0.084</math></p>   |
|  <p><math>\nu_{55}(a') = 1619 \text{ cm}^{-1}</math><br/><math> Q_1  = 0.039 \text{ amu}^{1/2} \text{ \AA}</math><br/><math>S_1 = 0.036</math></p>   |  <p><math>\nu_{56}(a') = 1636 \text{ cm}^{-1}</math><br/><math> Q_1  = 0.087 \text{ amu}^{1/2} \text{ \AA}</math><br/><math>S_1 = 0.184</math></p>   |
|  <p><math>\nu_{57}(a') = 1649 \text{ cm}^{-1}</math><br/><math> Q_1  = 0.055 \text{ amu}^{1/2} \text{ \AA}</math><br/><math>S_1 = 0.073</math></p>   |  <p><math>\nu_{58}(a') = 1690 \text{ cm}^{-1}</math><br/><math> Q_1  = 0.124 \text{ amu}^{1/2} \text{ \AA}</math><br/><math>S_1 = 0.384</math></p>   |
|  <p><math>\nu_{59}(a') = 3158 \text{ cm}^{-1}</math><br/><math> Q_1  = 0.004 \text{ amu}^{1/2} \text{ \AA}</math><br/><math>S_1 = 0.001</math></p> |  <p><math>\nu_{60}(a') = 3166 \text{ cm}^{-1}</math><br/><math> Q_1  = 0.001 \text{ amu}^{1/2} \text{ \AA}</math><br/><math>S_1 = 0.000</math></p> |
|  <p><math>\nu_{61}(a') = 3174 \text{ cm}^{-1}</math><br/><math> Q_1  = 0.000 \text{ amu}^{1/2} \text{ \AA}</math><br/><math>S_1 = 0.000</math></p> |  <p><math>\nu_{62}(a') = 3185 \text{ cm}^{-1}</math><br/><math> Q_1  = 0.001 \text{ amu}^{1/2} \text{ \AA}</math><br/><math>S_1 = 0.000</math></p> |

*To be continued ...*

Table S1: *continued.*

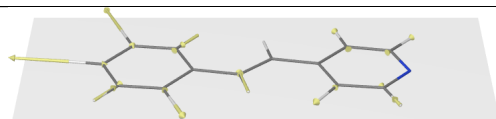

$$\nu_{63}(a') = 3188 \text{ cm}^{-1}$$

$$|Q_1| = 0.001 \text{ amu}^{1/2} \text{ \AA}$$

$$S_1 = 0.000$$

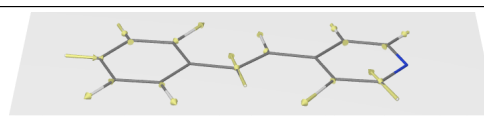

$$\nu_{64}(a') = 3189 \text{ cm}^{-1}$$

$$|Q_1| = 0.002 \text{ amu}^{1/2} \text{ \AA}$$

$$S_1 = 0.000$$

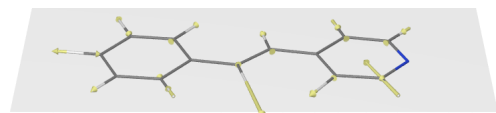

$$\nu_{65}(a') = 3191 \text{ cm}^{-1}$$

$$|Q_1| = 0.002 \text{ amu}^{1/2} \text{ \AA}$$

$$S_1 = 0.000$$

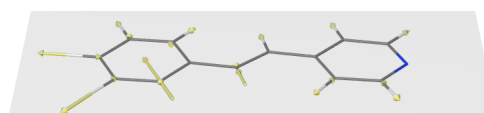

$$\nu_{66}(a') = 3198 \text{ cm}^{-1}$$

$$|Q_1| = 0.001 \text{ amu}^{1/2} \text{ \AA}$$

$$S_1 = 0.000$$

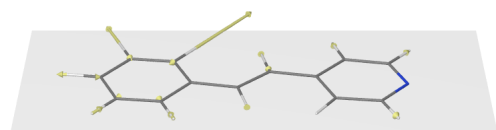

$$\nu_{67}(a') = 3205 \text{ cm}^{-1}$$

$$|Q_1| = 0.001 \text{ amu}^{1/2} \text{ \AA}$$

$$S_1 = 0.000$$

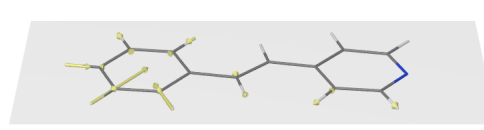

$$\nu_{68}(a') = 3216 \text{ cm}^{-1}$$

$$|Q_1| = 0.002 \text{ amu}^{1/2} \text{ \AA}$$

$$S_1 = 0.000$$

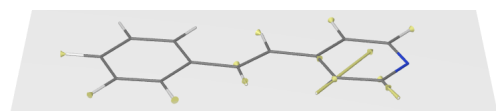

$$\nu_{69}(a') = 3225 \text{ cm}^{-1}$$

$$|Q_1| = 0.001 \text{ amu}^{1/2} \text{ \AA}$$

$$S_1 = 0.000$$



## 1.2 *Cis*-4-styrylpyridine: vibrational analysis in the ground state and $S_0 \rightarrow S_1, S_2$ Huang-Rhys factors (BOP/ $\mathcal{G}$ results)

Table S2: Vibrational normal coordinates and frequencies obtained within the harmonic approximation for *cis*-4-styrylpyridine in the  $S_0$  ground state. The  $|Q_I|$ 's are the magnitudes of the projections on the ground-state mass-weighted normal coordinates of the structural variation induced by the  $S_0 \rightarrow S_I$  change of states, the  $S_I$ 's are the associated Huang-Rhys factors ( $I = 1, 2$ ; BOP/ $\mathcal{G}$  results).

|                                                                                                                                                                                                                                                                                                                              |                                                                                                                                                                                                                                                                                                                               |
|------------------------------------------------------------------------------------------------------------------------------------------------------------------------------------------------------------------------------------------------------------------------------------------------------------------------------|-------------------------------------------------------------------------------------------------------------------------------------------------------------------------------------------------------------------------------------------------------------------------------------------------------------------------------|
| 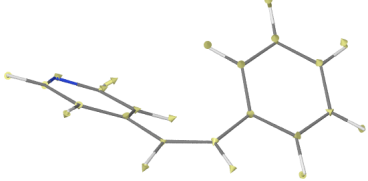 <p><math>\nu_1(a) = 40 \text{ cm}^{-1}</math></p> <p><math> Q_1  = 0.286 \text{ amu}^{1/2} \text{ \AA}</math>   <math> Q_2  = 1.457 \text{ amu}^{1/2} \text{ \AA}</math></p> <p><math>S_1 = 0.048</math>   <math>S_2 = 1.253</math></p>    |  <p><math>\nu_2(a) = 48 \text{ cm}^{-1}</math></p> <p><math> Q_1  = 0.961 \text{ amu}^{1/2} \text{ \AA}</math>   <math> Q_2  = 1.860 \text{ amu}^{1/2} \text{ \AA}</math></p> <p><math>S_1 = 0.665</math>   <math>S_2 = 2.488</math></p>    |
|  <p><math>\nu_3(a) = 80 \text{ cm}^{-1}</math></p> <p><math> Q_1  = 0.239 \text{ amu}^{1/2} \text{ \AA}</math>   <math> Q_2  = 1.800 \text{ amu}^{1/2} \text{ \AA}</math></p> <p><math>S_1 = 0.068</math>   <math>S_2 = 3.865</math></p>   |  <p><math>\nu_4(a) = 155 \text{ cm}^{-1}</math></p> <p><math> Q_1  = 0.721 \text{ amu}^{1/2} \text{ \AA}</math>   <math> Q_2  = 1.062 \text{ amu}^{1/2} \text{ \AA}</math></p> <p><math>S_1 = 1.198</math>   <math>S_2 = 2.597</math></p>  |
|  <p><math>\nu_5(a) = 156 \text{ cm}^{-1}</math></p> <p><math> Q_1  = 0.404 \text{ amu}^{1/2} \text{ \AA}</math>   <math> Q_2  = 0.803 \text{ amu}^{1/2} \text{ \AA}</math></p> <p><math>S_1 = 0.378</math>   <math>S_2 = 1.495</math></p> |  <p><math>\nu_6(a) = 237 \text{ cm}^{-1}</math></p> <p><math> Q_1  = 0.116 \text{ amu}^{1/2} \text{ \AA}</math>   <math> Q_2  = 0.001 \text{ amu}^{1/2} \text{ \AA}</math></p> <p><math>S_1 = 0.048</math>   <math>S_2 = 0.000</math></p> |
| <p><i>To be continued ...</i></p>                                                                                                                                                                                                                                                                                            |                                                                                                                                                                                                                                                                                                                               |

Table S2: *continued.*

|                                                                                                                                                                                                                                                                                                                                 |                                                                                                                                                                                                                                                                                                                                  |
|---------------------------------------------------------------------------------------------------------------------------------------------------------------------------------------------------------------------------------------------------------------------------------------------------------------------------------|----------------------------------------------------------------------------------------------------------------------------------------------------------------------------------------------------------------------------------------------------------------------------------------------------------------------------------|
| 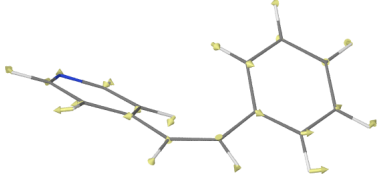 <p><math>\nu_7(a) = 259 \text{ cm}^{-1}</math></p> <p><math> Q_1  = 0.147 \text{ amu}^{1/2} \text{ \AA}</math>   <math> Q_2  = 0.169 \text{ amu}^{1/2} \text{ \AA}</math></p> <p><math>S_1 = 0.083</math>   <math>S_2 = 0.109</math></p>      |  <p><math>\nu_8(a) = 372 \text{ cm}^{-1}</math></p> <p><math> Q_1  = 0.027 \text{ amu}^{1/2} \text{ \AA}</math>   <math> Q_2  = 0.068 \text{ amu}^{1/2} \text{ \AA}</math></p> <p><math>S_1 = 0.004</math>   <math>S_2 = 0.025</math></p>      |
|  <p><math>\nu_9(a) = 389 \text{ cm}^{-1}</math></p> <p><math> Q_1  = 0.398 \text{ amu}^{1/2} \text{ \AA}</math>   <math> Q_2  = 0.599 \text{ amu}^{1/2} \text{ \AA}</math></p> <p><math>S_1 = 0.914</math>   <math>S_2 = 2.074</math></p>      |  <p><math>\nu_{10}(a) = 399 \text{ cm}^{-1}</math></p> <p><math> Q_1  = 0.072 \text{ amu}^{1/2} \text{ \AA}</math>   <math> Q_2  = 0.089 \text{ amu}^{1/2} \text{ \AA}</math></p> <p><math>S_1 = 0.030</math>   <math>S_2 = 0.046</math></p>   |
|  <p><math>\nu_{11}(a) = 451 \text{ cm}^{-1}</math></p> <p><math> Q_1  = 0.009 \text{ amu}^{1/2} \text{ \AA}</math>   <math> Q_2  = 0.101 \text{ amu}^{1/2} \text{ \AA}</math></p> <p><math>S_1 = 0.001</math>   <math>S_2 = 0.069</math></p>  |  <p><math>\nu_{12}(a) = 495 \text{ cm}^{-1}</math></p> <p><math> Q_1  = 0.260 \text{ amu}^{1/2} \text{ \AA}</math>   <math> Q_2  = 0.124 \text{ amu}^{1/2} \text{ \AA}</math></p> <p><math>S_1 = 0.494</math>   <math>S_2 = 0.114</math></p>  |
|  <p><math>\nu_{13}(a) = 508 \text{ cm}^{-1}</math></p> <p><math> Q_1  = 0.040 \text{ amu}^{1/2} \text{ \AA}</math>   <math> Q_2  = 0.016 \text{ amu}^{1/2} \text{ \AA}</math></p> <p><math>S_1 = 0.012</math>   <math>S_2 = 0.002</math></p> |  <p><math>\nu_{14}(a) = 564 \text{ cm}^{-1}</math></p> <p><math> Q_1  = 0.218 \text{ amu}^{1/2} \text{ \AA}</math>   <math> Q_2  = 0.280 \text{ amu}^{1/2} \text{ \AA}</math></p> <p><math>S_1 = 0.396</math>   <math>S_2 = 0.657</math></p> |

*To be continued ...*

Table S2: *continued.*

|                                                                                                                                                                                                                                                                                                                                 |                                                                                                                                                                                                                                                                                                                                  |
|---------------------------------------------------------------------------------------------------------------------------------------------------------------------------------------------------------------------------------------------------------------------------------------------------------------------------------|----------------------------------------------------------------------------------------------------------------------------------------------------------------------------------------------------------------------------------------------------------------------------------------------------------------------------------|
| 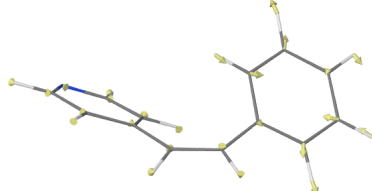 <p><math>\nu_{15}(a) = 608 \text{ cm}^{-1}</math></p> <p><math> Q_1  = 0.025 \text{ amu}^{1/2} \text{ \AA}</math>   <math> Q_2  = 0.023 \text{ amu}^{1/2} \text{ \AA}</math></p> <p><math>S_1 = 0.006</math>   <math>S_2 = 0.005</math></p>   |  <p><math>\nu_{16}(a) = 654 \text{ cm}^{-1}</math></p> <p><math> Q_1  = 0.064 \text{ amu}^{1/2} \text{ \AA}</math>   <math> Q_2  = 0.007 \text{ amu}^{1/2} \text{ \AA}</math></p> <p><math>S_1 = 0.040</math>   <math>S_2 = 0.001</math></p>   |
|  <p><math>\nu_{17}(a) = 680 \text{ cm}^{-1}</math></p> <p><math> Q_1  = 0.074 \text{ amu}^{1/2} \text{ \AA}</math>   <math> Q_2  = 0.024 \text{ amu}^{1/2} \text{ \AA}</math></p> <p><math>S_1 = 0.055</math>   <math>S_2 = 0.006</math></p>   |  <p><math>\nu_{18}(a) = 691 \text{ cm}^{-1}</math></p> <p><math> Q_1  = 0.067 \text{ amu}^{1/2} \text{ \AA}</math>   <math> Q_2  = 0.003 \text{ amu}^{1/2} \text{ \AA}</math></p> <p><math>S_1 = 0.047</math>   <math>S_2 = 0.000</math></p>   |
|  <p><math>\nu_{19}(a) = 722 \text{ cm}^{-1}</math></p> <p><math> Q_1  = 0.073 \text{ amu}^{1/2} \text{ \AA}</math>   <math> Q_2  = 0.074 \text{ amu}^{1/2} \text{ \AA}</math></p> <p><math>S_1 = 0.057</math>   <math>S_2 = 0.059</math></p> |  <p><math>\nu_{20}(a) = 734 \text{ cm}^{-1}</math></p> <p><math> Q_1  = 0.187 \text{ amu}^{1/2} \text{ \AA}</math>   <math> Q_2  = 0.112 \text{ amu}^{1/2} \text{ \AA}</math></p> <p><math>S_1 = 0.383</math>   <math>S_2 = 0.136</math></p> |
|  <p><math>\nu_{21}(a) = 747 \text{ cm}^{-1}</math></p> <p><math> Q_1  = 0.103 \text{ amu}^{1/2} \text{ \AA}</math>   <math> Q_2  = 0.005 \text{ amu}^{1/2} \text{ \AA}</math></p> <p><math>S_1 = 0.118</math>   <math>S_2 = 0.000</math></p> |  <p><math>\nu_{22}(a) = 772 \text{ cm}^{-1}</math></p> <p><math> Q_1  = 0.062 \text{ amu}^{1/2} \text{ \AA}</math>   <math> Q_2  = 0.081 \text{ amu}^{1/2} \text{ \AA}</math></p> <p><math>S_1 = 0.045</math>   <math>S_2 = 0.074</math></p> |

*To be continued ...*

Table S2: *continued.*

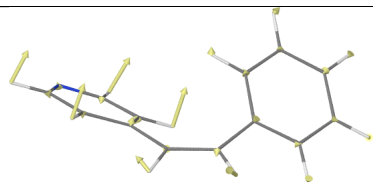

$$\nu_{23}(a) = 811 \text{ cm}^{-1}$$

$$|Q_1| = 0.120 \text{ amu}^{1/2} \text{ \AA} \quad |Q_2| = 0.085 \text{ amu}^{1/2} \text{ \AA}$$

$$S_1 = 0.174$$

$$S_2 = 0.087$$

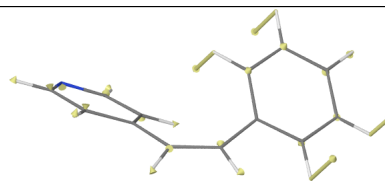

$$\nu_{24}(a) = 834 \text{ cm}^{-1}$$

$$|Q_1| = 0.041 \text{ amu}^{1/2} \text{ \AA} \quad |Q_2| = 0.060 \text{ amu}^{1/2} \text{ \AA}$$

$$S_1 = 0.021$$

$$S_2 = 0.045$$

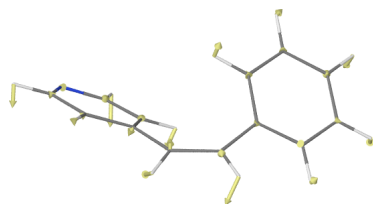

$$\nu_{25}(a) = 860 \text{ cm}^{-1}$$

$$|Q_1| = 0.072 \text{ amu}^{1/2} \text{ \AA} \quad |Q_2| = 0.014 \text{ amu}^{1/2} \text{ \AA}$$

$$S_1 = 0.066$$

$$S_2 = 0.002$$

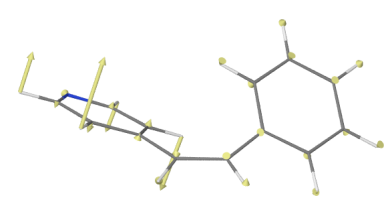

$$\nu_{26}(a) = 864 \text{ cm}^{-1}$$

$$|Q_1| = 0.026 \text{ amu}^{1/2} \text{ \AA} \quad |Q_2| = 0.007 \text{ amu}^{1/2} \text{ \AA}$$

$$S_1 = 0.009$$

$$S_2 = 0.001$$

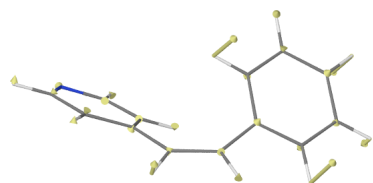

$$\nu_{27}(a) = 908 \text{ cm}^{-1}$$

$$|Q_1| = 0.063 \text{ amu}^{1/2} \text{ \AA} \quad |Q_2| = 0.085 \text{ amu}^{1/2} \text{ \AA}$$

$$S_1 = 0.053$$

$$S_2 = 0.096$$

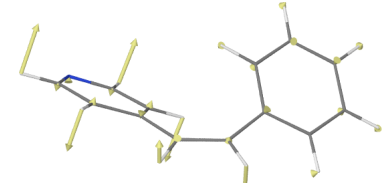

$$\nu_{28}(a) = 938 \text{ cm}^{-1}$$

$$|Q_1| = 0.031 \text{ amu}^{1/2} \text{ \AA} \quad |Q_2| = 0.103 \text{ amu}^{1/2} \text{ \AA}$$

$$S_1 = 0.013$$

$$S_2 = 0.149$$

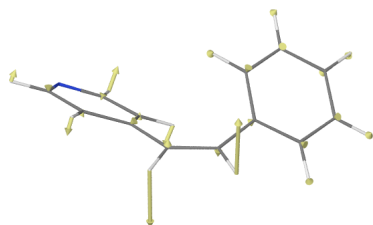

$$\nu_{29}(a) = 946 \text{ cm}^{-1}$$

$$|Q_1| = 0.102 \text{ amu}^{1/2} \text{ \AA} \quad |Q_2| = 0.148 \text{ amu}^{1/2} \text{ \AA}$$

$$S_1 = 0.145$$

$$S_2 = 0.306$$

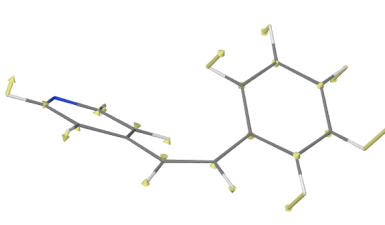

$$\nu_{30}(a) = 951 \text{ cm}^{-1}$$

$$|Q_1| = 0.031 \text{ amu}^{1/2} \text{ \AA} \quad |Q_2| = 0.040 \text{ amu}^{1/2} \text{ \AA}$$

$$S_1 = 0.013$$

$$S_2 = 0.023$$

*To be continued ...*

Table S2: *continued.*

|                                                                                                                                                                                                                                                                                                                                  |                                                                                                                                                                                                                                                                                                                                   |
|----------------------------------------------------------------------------------------------------------------------------------------------------------------------------------------------------------------------------------------------------------------------------------------------------------------------------------|-----------------------------------------------------------------------------------------------------------------------------------------------------------------------------------------------------------------------------------------------------------------------------------------------------------------------------------|
| 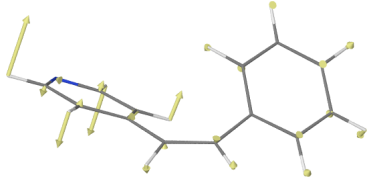 <p><math>\nu_{31}(a) = 955 \text{ cm}^{-1}</math></p> <p><math> Q_1  = 0.018 \text{ amu}^{1/2} \text{ \AA}</math>   <math> Q_2  = 0.082 \text{ amu}^{1/2} \text{ \AA}</math></p> <p><math>S_1 = 0.005</math>   <math>S_2 = 0.096</math></p>    |  <p><math>\nu_{32}(a) = 962 \text{ cm}^{-1}</math></p> <p><math> Q_1  = 0.281 \text{ amu}^{1/2} \text{ \AA}</math>   <math> Q_2  = 0.061 \text{ amu}^{1/2} \text{ \AA}</math></p> <p><math>S_1 = 1.130</math>   <math>S_2 = 0.053</math></p>    |
|  <p><math>\nu_{33}(a) = 971 \text{ cm}^{-1}</math></p> <p><math> Q_1  = 0.000 \text{ amu}^{1/2} \text{ \AA}</math>   <math> Q_2  = 0.039 \text{ amu}^{1/2} \text{ \AA}</math></p> <p><math>S_1 = 0.000</math>   <math>S_2 = 0.022</math></p>    |  <p><math>\nu_{34}(a) = 975 \text{ cm}^{-1}</math></p> <p><math> Q_1  = 0.045 \text{ amu}^{1/2} \text{ \AA}</math>   <math> Q_2  = 0.019 \text{ amu}^{1/2} \text{ \AA}</math></p> <p><math>S_1 = 0.029</math>   <math>S_2 = 0.005</math></p>    |
|  <p><math>\nu_{35}(a) = 1013 \text{ cm}^{-1}</math></p> <p><math> Q_1  = 0.016 \text{ amu}^{1/2} \text{ \AA}</math>   <math> Q_2  = 0.032 \text{ amu}^{1/2} \text{ \AA}</math></p> <p><math>S_1 = 0.004</math>   <math>S_2 = 0.015</math></p> |  <p><math>\nu_{36}(a) = 1055 \text{ cm}^{-1}</math></p> <p><math> Q_1  = 0.011 \text{ amu}^{1/2} \text{ \AA}</math>   <math> Q_2  = 0.029 \text{ amu}^{1/2} \text{ \AA}</math></p> <p><math>S_1 = 0.002</math>   <math>S_2 = 0.013</math></p> |
|  <p><math>\nu_{37}(a) = 1072 \text{ cm}^{-1}</math></p> <p><math> Q_1  = 0.013 \text{ amu}^{1/2} \text{ \AA}</math>   <math> Q_2  = 0.003 \text{ amu}^{1/2} \text{ \AA}</math></p> <p><math>S_1 = 0.003</math>   <math>S_2 = 0.000</math></p> |  <p><math>\nu_{38}(a) = 1081 \text{ cm}^{-1}</math></p> <p><math> Q_1  = 0.020 \text{ amu}^{1/2} \text{ \AA}</math>   <math> Q_2  = 0.016 \text{ amu}^{1/2} \text{ \AA}</math></p> <p><math>S_1 = 0.006</math>   <math>S_2 = 0.004</math></p> |

*To be continued ...*

Table S2: *continued.*

|                                                                                                                                                                                                                                                                                                                                  |                                                                                                                                                                                                                                                                                                                                   |
|----------------------------------------------------------------------------------------------------------------------------------------------------------------------------------------------------------------------------------------------------------------------------------------------------------------------------------|-----------------------------------------------------------------------------------------------------------------------------------------------------------------------------------------------------------------------------------------------------------------------------------------------------------------------------------|
| 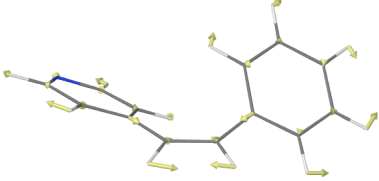 <p><math>\nu_{39}(a) = 1139 \text{ cm}^{-1}</math></p> <p><math> Q_1  = 0.130 \text{ amu}^{1/2} \text{ \AA}</math>   <math> Q_2  = 0.068 \text{ amu}^{1/2} \text{ \AA}</math></p> <p><math>S_1 = 0.286</math>   <math>S_2 = 0.077</math></p>   |  <p><math>\nu_{40}(a) = 1157 \text{ cm}^{-1}</math></p> <p><math> Q_1  = 0.029 \text{ amu}^{1/2} \text{ \AA}</math>   <math> Q_2  = 0.037 \text{ amu}^{1/2} \text{ \AA}</math></p> <p><math>S_1 = 0.014</math>   <math>S_2 = 0.023</math></p>   |
|  <p><math>\nu_{41}(a) = 1173 \text{ cm}^{-1}</math></p> <p><math> Q_1  = 0.019 \text{ amu}^{1/2} \text{ \AA}</math>   <math> Q_2  = 0.026 \text{ amu}^{1/2} \text{ \AA}</math></p> <p><math>S_1 = 0.006</math>   <math>S_2 = 0.011</math></p>   |  <p><math>\nu_{42}(a) = 1193 \text{ cm}^{-1}</math></p> <p><math> Q_1  = 0.076 \text{ amu}^{1/2} \text{ \AA}</math>   <math> Q_2  = 0.019 \text{ amu}^{1/2} \text{ \AA}</math></p> <p><math>S_1 = 0.101</math>   <math>S_2 = 0.006</math></p>   |
|  <p><math>\nu_{43}(a) = 1210 \text{ cm}^{-1}</math></p> <p><math> Q_1  = 0.020 \text{ amu}^{1/2} \text{ \AA}</math>   <math> Q_2  = 0.021 \text{ amu}^{1/2} \text{ \AA}</math></p> <p><math>S_1 = 0.007</math>   <math>S_2 = 0.008</math></p>  |  <p><math>\nu_{44}(a) = 1234 \text{ cm}^{-1}</math></p> <p><math> Q_1  = 0.033 \text{ amu}^{1/2} \text{ \AA}</math>   <math> Q_2  = 0.008 \text{ amu}^{1/2} \text{ \AA}</math></p> <p><math>S_1 = 0.020</math>   <math>S_2 = 0.001</math></p>  |
|  <p><math>\nu_{45}(a) = 1276 \text{ cm}^{-1}</math></p> <p><math> Q_1  = 0.023 \text{ amu}^{1/2} \text{ \AA}</math>   <math> Q_2  = 0.002 \text{ amu}^{1/2} \text{ \AA}</math></p> <p><math>S_1 = 0.010</math>   <math>S_2 = 0.000</math></p> |  <p><math>\nu_{46}(a) = 1310 \text{ cm}^{-1}</math></p> <p><math> Q_1  = 0.001 \text{ amu}^{1/2} \text{ \AA}</math>   <math> Q_2  = 0.001 \text{ amu}^{1/2} \text{ \AA}</math></p> <p><math>S_1 = 0.000</math>   <math>S_2 = 0.000</math></p> |

*To be continued ...*

Table S2: *continued.*

|                                                                                                                                                                                                                                                                                                                                  |                                                                                                                                                                                                                                                                                                                                   |
|----------------------------------------------------------------------------------------------------------------------------------------------------------------------------------------------------------------------------------------------------------------------------------------------------------------------------------|-----------------------------------------------------------------------------------------------------------------------------------------------------------------------------------------------------------------------------------------------------------------------------------------------------------------------------------|
| 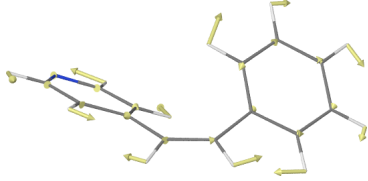 <p><math>\nu_{47}(a) = 1327 \text{ cm}^{-1}</math></p> <p><math> Q_1  = 0.039 \text{ amu}^{1/2} \text{ \AA}</math>   <math> Q_2  = 0.037 \text{ amu}^{1/2} \text{ \AA}</math></p> <p><math>S_1 = 0.030</math>   <math>S_2 = 0.027</math></p>   |  <p><math>\nu_{48}(a) = 1332 \text{ cm}^{-1}</math></p> <p><math> Q_1  = 0.020 \text{ amu}^{1/2} \text{ \AA}</math>   <math> Q_2  = 0.002 \text{ amu}^{1/2} \text{ \AA}</math></p> <p><math>S_1 = 0.008</math>   <math>S_2 = 0.000</math></p>   |
|  <p><math>\nu_{49}(a) = 1396 \text{ cm}^{-1}</math></p> <p><math> Q_1  = 0.010 \text{ amu}^{1/2} \text{ \AA}</math>   <math> Q_2  = 0.021 \text{ amu}^{1/2} \text{ \AA}</math></p> <p><math>S_1 = 0.002</math>   <math>S_2 = 0.009</math></p>   |  <p><math>\nu_{50}(a) = 1410 \text{ cm}^{-1}</math></p> <p><math> Q_1  = 0.010 \text{ amu}^{1/2} \text{ \AA}</math>   <math> Q_2  = 0.021 \text{ amu}^{1/2} \text{ \AA}</math></p> <p><math>S_1 = 0.002</math>   <math>S_2 = 0.009</math></p>   |
|  <p><math>\nu_{51}(a) = 1431 \text{ cm}^{-1}</math></p> <p><math> Q_1  = 0.015 \text{ amu}^{1/2} \text{ \AA}</math>   <math> Q_2  = 0.027 \text{ amu}^{1/2} \text{ \AA}</math></p> <p><math>S_1 = 0.005</math>   <math>S_2 = 0.015</math></p>  |  <p><math>\nu_{52}(a) = 1467 \text{ cm}^{-1}</math></p> <p><math> Q_1  = 0.023 \text{ amu}^{1/2} \text{ \AA}</math>   <math> Q_2  = 0.044 \text{ amu}^{1/2} \text{ \AA}</math></p> <p><math>S_1 = 0.011</math>   <math>S_2 = 0.042</math></p>  |
|  <p><math>\nu_{53}(a) = 1472 \text{ cm}^{-1}</math></p> <p><math> Q_1  = 0.006 \text{ amu}^{1/2} \text{ \AA}</math>   <math> Q_2  = 0.010 \text{ amu}^{1/2} \text{ \AA}</math></p> <p><math>S_1 = 0.001</math>   <math>S_2 = 0.002</math></p> |  <p><math>\nu_{54}(a) = 1522 \text{ cm}^{-1}</math></p> <p><math> Q_1  = 0.036 \text{ amu}^{1/2} \text{ \AA}</math>   <math> Q_2  = 0.056 \text{ amu}^{1/2} \text{ \AA}</math></p> <p><math>S_1 = 0.029</math>   <math>S_2 = 0.070</math></p> |
| <p><i>To be continued ...</i></p>                                                                                                                                                                                                                                                                                                |                                                                                                                                                                                                                                                                                                                                   |

Table S2: *continued.*

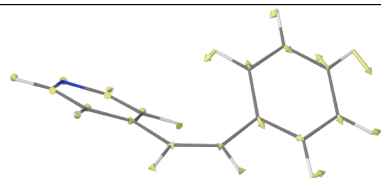

$$\nu_{55}(a) = 1555 \text{ cm}^{-1}$$

$$|Q_1| = 0.020 \text{ amu}^{1/2} \text{ \AA} \quad |Q_2| = 0.048 \text{ amu}^{1/2} \text{ \AA}$$

$$S_1 = 0.010$$

$$S_2 = 0.052$$

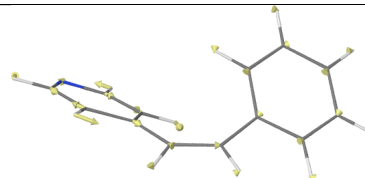

$$\nu_{56}(a) = 1566 \text{ cm}^{-1}$$

$$|Q_1| = 0.009 \text{ amu}^{1/2} \text{ \AA} \quad |Q_2| = 0.054 \text{ amu}^{1/2} \text{ \AA}$$

$$S_1 = 0.002$$

$$S_2 = 0.069$$

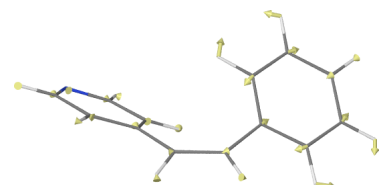

$$\nu_{57}(a) = 1579 \text{ cm}^{-1}$$

$$|Q_1| = 0.056 \text{ amu}^{1/2} \text{ \AA} \quad |Q_2| = 0.046 \text{ amu}^{1/2} \text{ \AA}$$

$$S_1 = 0.074$$

$$S_2 = 0.049$$

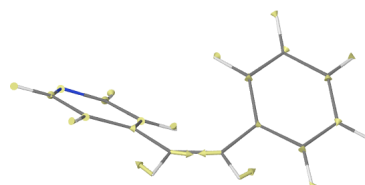

$$\nu_{58}(a) = 1607 \text{ cm}^{-1}$$

$$|Q_1| = 0.074 \text{ amu}^{1/2} \text{ \AA} \quad |Q_2| = 0.053 \text{ amu}^{1/2} \text{ \AA}$$

$$S_1 = 0.129$$

$$S_2 = 0.066$$

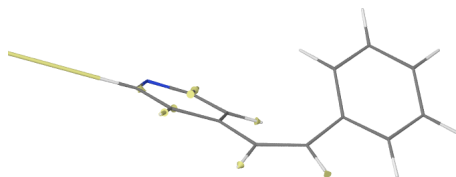

$$\nu_{59}(a) = 3074 \text{ cm}^{-1}$$

$$|Q_1| = 0.016 \text{ amu}^{1/2} \text{ \AA} \quad |Q_2| = 0.005 \text{ amu}^{1/2} \text{ \AA}$$

$$S_1 = 0.012$$

$$S_2 = 0.001$$

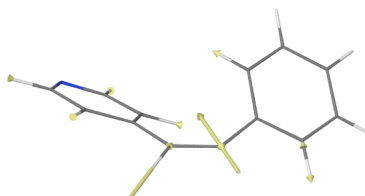

$$\nu_{60}(a) = 3081 \text{ cm}^{-1}$$

$$|Q_1| = 0.006 \text{ amu}^{1/2} \text{ \AA} \quad |Q_2| = 0.006 \text{ amu}^{1/2} \text{ \AA}$$

$$S_1 = 0.002$$

$$S_2 = 0.002$$

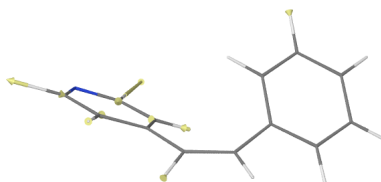

$$\nu_{61}(a) = 3081 \text{ cm}^{-1}$$

$$|Q_1| = 0.012 \text{ amu}^{1/2} \text{ \AA} \quad |Q_2| = 0.008 \text{ amu}^{1/2} \text{ \AA}$$

$$S_1 = 0.007$$

$$S_2 = 0.003$$

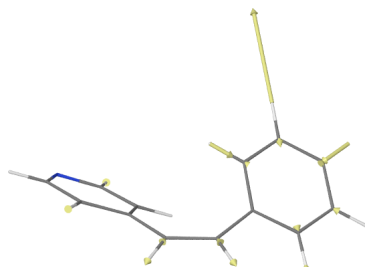

$$\nu_{62}(a) = 3102 \text{ cm}^{-1}$$

$$|Q_1| = 0.000 \text{ amu}^{1/2} \text{ \AA} \quad |Q_2| = 0.000 \text{ amu}^{1/2} \text{ \AA}$$

$$S_1 = 0.000$$

$$S_2 = 0.000$$

*To be continued ...*



Table S2: *continued.*

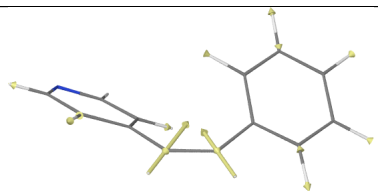

$$\nu_{63}(a) = 3102 \text{ cm}^{-1}$$

$$|Q_1| = 0.019 \text{ amu}^{1/2} \text{ \AA} \quad |Q_2| = 0.037 \text{ amu}^{1/2} \text{ \AA}$$

$$S_1 = 0.016$$

$$S_2 = 0.065$$

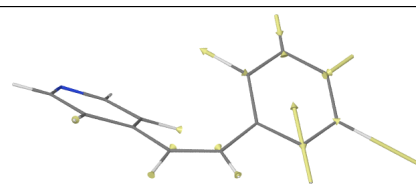

$$\nu_{64}(a) = 3117 \text{ cm}^{-1}$$

$$|Q_1| = 0.002 \text{ amu}^{1/2} \text{ \AA} \quad |Q_2| = 0.006 \text{ amu}^{1/2} \text{ \AA}$$

$$S_1 = 0.000$$

$$S_2 = 0.001$$

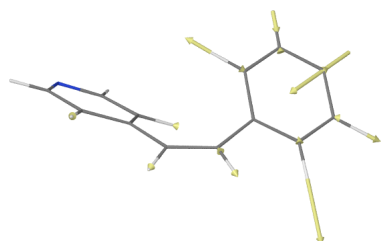

$$\nu_{65}(a) = 3124 \text{ cm}^{-1}$$

$$|Q_1| = 0.000 \text{ amu}^{1/2} \text{ \AA} \quad |Q_2| = 0.002 \text{ amu}^{1/2} \text{ \AA}$$

$$S_1 = 0.000$$

$$S_2 = 0.000$$

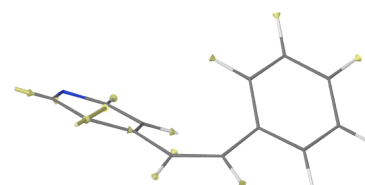

$$\nu_{66}(a) = 3126 \text{ cm}^{-1}$$

$$|Q_1| = 0.011 \text{ amu}^{1/2} \text{ \AA} \quad |Q_2| = 0.012 \text{ amu}^{1/2} \text{ \AA}$$

$$S_1 = 0.006$$

$$S_2 = 0.006$$

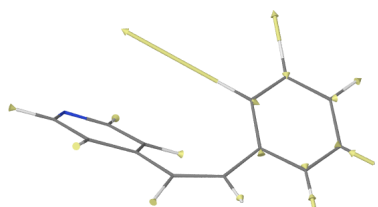

$$\nu_{67}(a) = 3133 \text{ cm}^{-1}$$

$$|Q_1| = 0.000 \text{ amu}^{1/2} \text{ \AA} \quad |Q_2| = 0.010 \text{ amu}^{1/2} \text{ \AA}$$

$$S_1 = 0.000$$

$$S_2 = 0.005$$

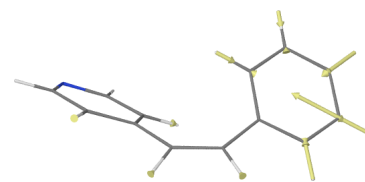

$$\nu_{68}(a) = 3143 \text{ cm}^{-1}$$

$$|Q_1| = 0.000 \text{ amu}^{1/2} \text{ \AA} \quad |Q_2| = 0.014 \text{ amu}^{1/2} \text{ \AA}$$

$$S_1 = 0.000$$

$$S_2 = 0.009$$

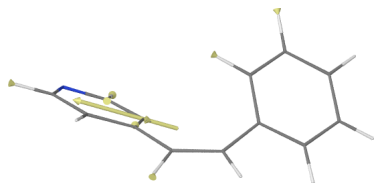

$$\nu_{69}(a) = 3165 \text{ cm}^{-1}$$

$$|Q_1| = 0.015 \text{ amu}^{1/2} \text{ \AA} \quad |Q_2| = 0.018 \text{ amu}^{1/2} \text{ \AA}$$

$$S_1 = 0.010$$

$$S_2 = 0.015$$

### 1.3 *Cis*-4-styrylpyridine: vibrational analysis in the ground state, optimised $S_1$ geometry and $S_0 \rightarrow S_1$ Huang-Rhys factors (B3LYP/ $\mathcal{G}$ results)

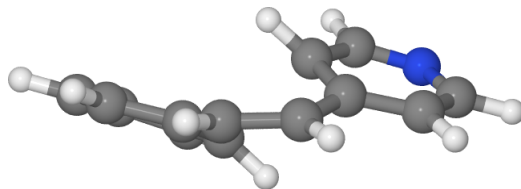

Figure S1: Optimised B3LYP/ $\mathcal{G}$  geometry of *cis*-4-styrylpyridine in the  $S_1$  state.

Table S3: Vibrational normal coordinates and frequencies obtained within the harmonic approximation for *cis*-4-styrylpyridine in the  $S_0$  ground state. The  $|Q_1|$ 's are the magnitudes of the projections on the ground-state mass-weighted normal coordinates of the structural variation induced by the  $S_0 \rightarrow S_1$  change of states, the  $\mathcal{S}_1$ 's are the associated Huang-Rhys factors (B3LYP/ $\mathcal{G}$  results).

---

|                                                                                     |                                                                                      |
|-------------------------------------------------------------------------------------|--------------------------------------------------------------------------------------|
| 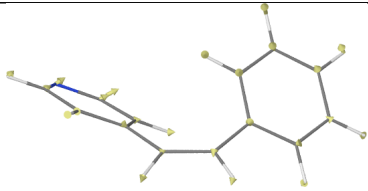  |   |
| $\nu_1(a) = 37 \text{ cm}^{-1}$                                                     | $\nu_2(a) = 51 \text{ cm}^{-1}$                                                      |
| $ Q_1  = 3.232 \text{ amu}^{1/2} \text{ \AA}$                                       | $ Q_1  = 1.648 \text{ amu}^{1/2} \text{ \AA}$                                        |
| $\mathcal{S}_1 = 5.784$                                                             | $\mathcal{S}_1 = 2.057$                                                              |
|  |  |
| $\nu_3(a) = 82 \text{ cm}^{-1}$                                                     | $\nu_4(a) = 157 \text{ cm}^{-1}$                                                     |
| $ Q_1  = 5.228 \text{ amu}^{1/2} \text{ \AA}$                                       | $ Q_1  = 0.399 \text{ amu}^{1/2} \text{ \AA}$                                        |
| $\mathcal{S}_1 = 33.169$                                                            | $\mathcal{S}_1 = 0.370$                                                              |

---

*To be continued ...*

---

Table S3: *continued.*

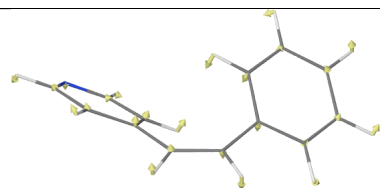

$$\nu_5(a) = 163 \text{ cm}^{-1}$$

$$|Q_1| = 1.700 \text{ amu}^{1/2} \text{ \AA}$$

$$S_1 = 6.970$$

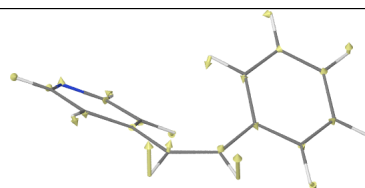

$$\nu_6(a) = 247 \text{ cm}^{-1}$$

$$|Q_1| = 0.033 \text{ amu}^{1/2} \text{ \AA}$$

$$S_1 = 0.004$$

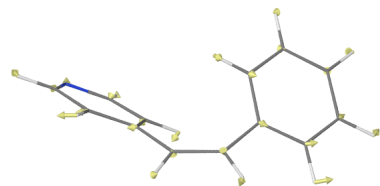

$$\nu_7(a) = 266 \text{ cm}^{-1}$$

$$|Q_1| = 0.254 \text{ amu}^{1/2} \text{ \AA}$$

$$S_1 = 0.254$$

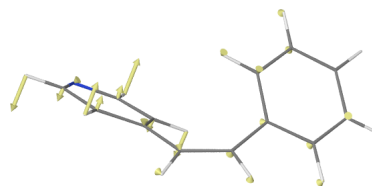

$$\nu_8(a) = 391 \text{ cm}^{-1}$$

$$|Q_1| = 0.112 \text{ amu}^{1/2} \text{ \AA}$$

$$S_1 = 0.073$$

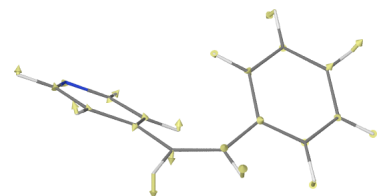

$$\nu_9(a) = 408 \text{ cm}^{-1}$$

$$|Q_1| = 0.580 \text{ amu}^{1/2} \text{ \AA}$$

$$S_1 = 2.033$$

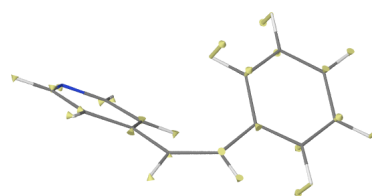

$$\nu_{10}(a) = 413 \text{ cm}^{-1}$$

$$|Q_1| = 0.071 \text{ amu}^{1/2} \text{ \AA}$$

$$S_1 = 0.030$$

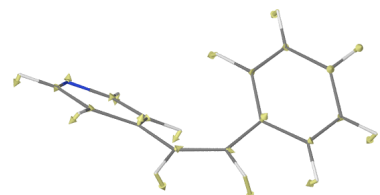

$$\nu_{11}(a) = 464 \text{ cm}^{-1}$$

$$|Q_1| = 0.086 \text{ amu}^{1/2} \text{ \AA}$$

$$S_1 = 0.051$$

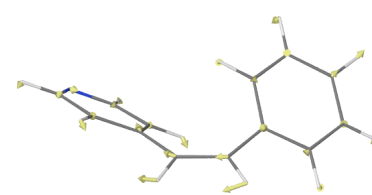

$$\nu_{12}(a) = 507 \text{ cm}^{-1}$$

$$|Q_1| = 0.081 \text{ amu}^{1/2} \text{ \AA}$$

$$S_1 = 0.049$$

*To be continued ...*

Table S3: *continued.*

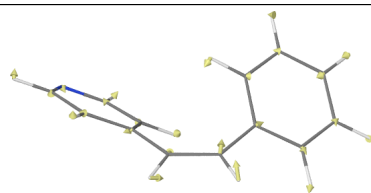

$$\nu_{13}(a) = 523 \text{ cm}^{-1}$$

$$|Q_1| = 0.073 \text{ amu}^{1/2} \text{ \AA}$$

$$S_1 = 0.042$$

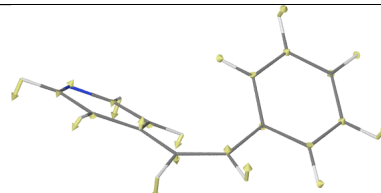

$$\nu_{14}(a) = 584 \text{ cm}^{-1}$$

$$|Q_1| = 0.198 \text{ amu}^{1/2} \text{ \AA}$$

$$S_1 = 0.341$$

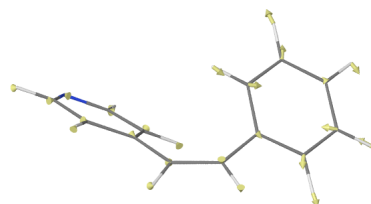

$$\nu_{15}(a) = 623 \text{ cm}^{-1}$$

$$|Q_1| = 0.086 \text{ amu}^{1/2} \text{ \AA}$$

$$S_1 = 0.069$$

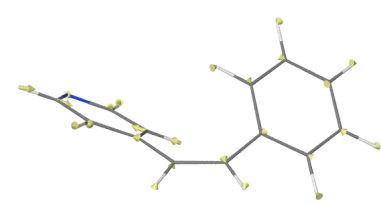

$$\nu_{16}(a) = 674 \text{ cm}^{-1}$$

$$|Q_1| = 0.184 \text{ amu}^{1/2} \text{ \AA}$$

$$S_1 = 0.337$$

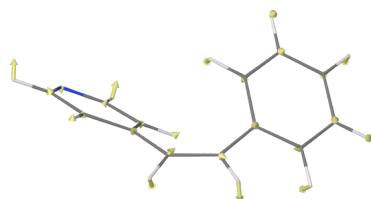

$$\nu_{17}(a) = 701 \text{ cm}^{-1}$$

$$|Q_1| = 0.044 \text{ amu}^{1/2} \text{ \AA}$$

$$S_1 = 0.020$$

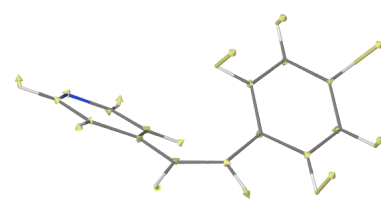

$$\nu_{18}(a) = 712 \text{ cm}^{-1}$$

$$|Q_1| = 0.091 \text{ amu}^{1/2} \text{ \AA}$$

$$S_1 = 0.088$$

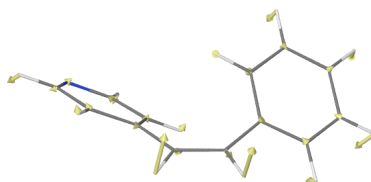

$$\nu_{19}(a) = 747 \text{ cm}^{-1}$$

$$|Q_1| = 0.043 \text{ amu}^{1/2} \text{ \AA}$$

$$S_1 = 0.021$$

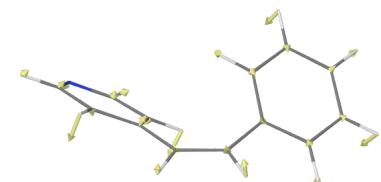

$$\nu_{20}(a) = 761 \text{ cm}^{-1}$$

$$|Q_1| = 0.092 \text{ amu}^{1/2} \text{ \AA}$$

$$S_1 = 0.095$$

*To be continued ...*

Table S3: *continued.*

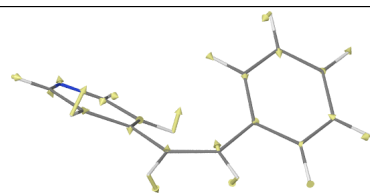

$$\nu_{21}(a) = 774 \text{ cm}^{-1}$$

$$|Q_1| = 0.034 \text{ amu}^{1/2} \text{ \AA}$$

$$S_1 = 0.013$$

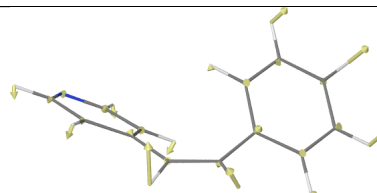

$$\nu_{22}(a) = 798 \text{ cm}^{-1}$$

$$|Q_1| = 0.188 \text{ amu}^{1/2} \text{ \AA}$$

$$S_1 = 0.419$$

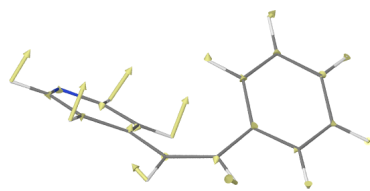

$$\nu_{23}(a) = 837 \text{ cm}^{-1}$$

$$|Q_1| = 0.196 \text{ amu}^{1/2} \text{ \AA}$$

$$S_1 = 0.475$$

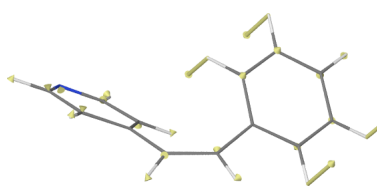

$$\nu_{24}(a) = 862 \text{ cm}^{-1}$$

$$|Q_1| = 0.186 \text{ amu}^{1/2} \text{ \AA}$$

$$S_1 = 0.443$$

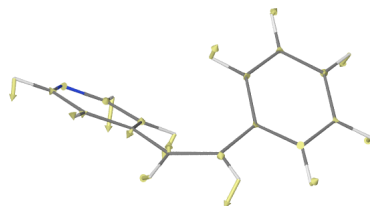

$$\nu_{25}(a) = 891 \text{ cm}^{-1}$$

$$|Q_1| = 0.394 \text{ amu}^{1/2} \text{ \AA}$$

$$S_1 = 2.048$$

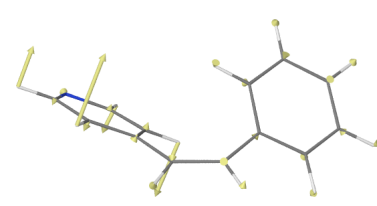

$$\nu_{26}(a) = 892 \text{ cm}^{-1}$$

$$|Q_1| = 0.241 \text{ amu}^{1/2} \text{ \AA}$$

$$S_1 = 0.768$$

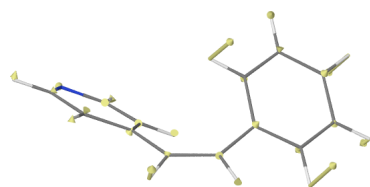

$$\nu_{27}(a) = 941 \text{ cm}^{-1}$$

$$|Q_1| = 0.201 \text{ amu}^{1/2} \text{ \AA}$$

$$S_1 = 0.563$$

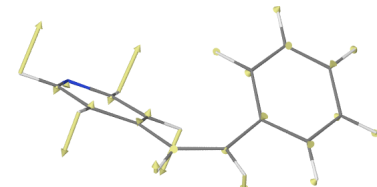

$$\nu_{28}(a) = 976 \text{ cm}^{-1}$$

$$|Q_1| = 0.202 \text{ amu}^{1/2} \text{ \AA}$$

$$S_1 = 0.592$$

*To be continued ...*

Table S3: *continued.*

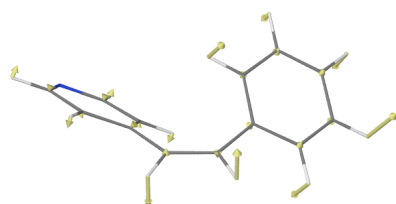

$$\nu_{29}(a) = 988 \text{ cm}^{-1}$$

$$|Q_1| = 0.102 \text{ amu}^{1/2} \text{ \AA}$$

$$S_1 = 0.153$$

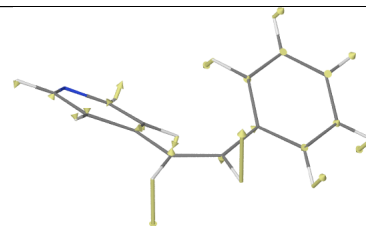

$$\nu_{30}(a) = 989 \text{ cm}^{-1}$$

$$|Q_1| = 0.152 \text{ amu}^{1/2} \text{ \AA}$$

$$S_1 = 0.338$$

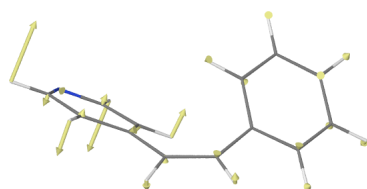

$$\nu_{31}(a) = 995 \text{ cm}^{-1}$$

$$|Q_1| = 0.161 \text{ amu}^{1/2} \text{ \AA}$$

$$S_1 = 0.382$$

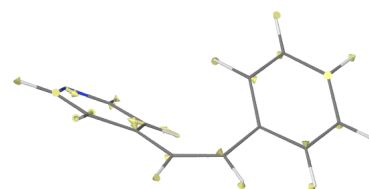

$$\nu_{32}(a) = 1001 \text{ cm}^{-1}$$

$$|Q_1| = 0.188 \text{ amu}^{1/2} \text{ \AA}$$

$$S_1 = 0.526$$

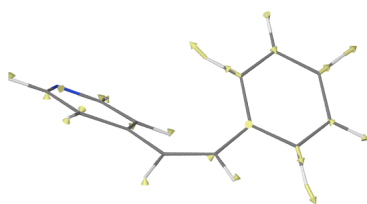

$$\nu_{33}(a) = 1005 \text{ cm}^{-1}$$

$$|Q_1| = 0.056 \text{ amu}^{1/2} \text{ \AA}$$

$$S_1 = 0.047$$

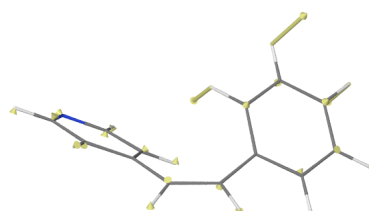

$$\nu_{34}(a) = 1008 \text{ cm}^{-1}$$

$$|Q_1| = 0.169 \text{ amu}^{1/2} \text{ \AA}$$

$$S_1 = 0.427$$

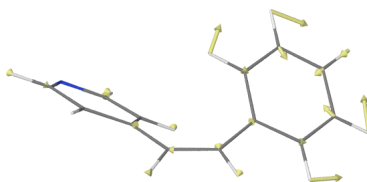

$$\nu_{35}(a) = 1045 \text{ cm}^{-1}$$

$$|Q_1| = 0.187 \text{ amu}^{1/2} \text{ \AA}$$

$$S_1 = 0.547$$

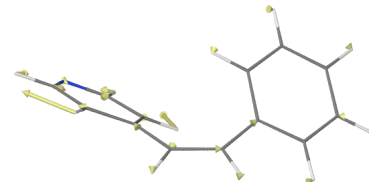

$$\nu_{36}(a) = 1089 \text{ cm}^{-1}$$

$$|Q_1| = 0.199 \text{ amu}^{1/2} \text{ \AA}$$

$$S_1 = 0.636$$

*To be continued ...*

Table S3: *continued.*

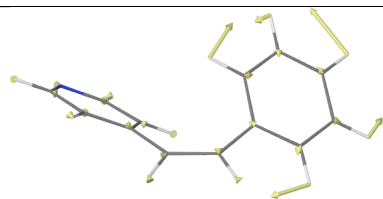

$$\nu_{37}(a) = 1101 \text{ cm}^{-1}$$

$$|Q_1| = 0.043 \text{ amu}^{1/2} \text{ \AA}$$

$$S_1 = 0.031$$

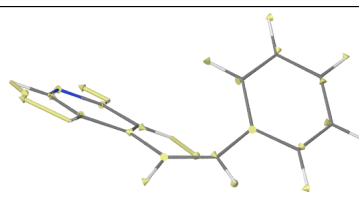

$$\nu_{38}(a) = 1113 \text{ cm}^{-1}$$

$$|Q_1| = 0.065 \text{ amu}^{1/2} \text{ \AA}$$

$$S_1 = 0.071$$

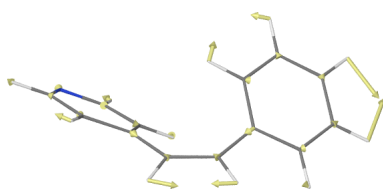

$$\nu_{39}(a) = 1177 \text{ cm}^{-1}$$

$$|Q_1| = 0.10 \text{ amu}^{1/2} \text{ \AA}$$

$$S_1 = 0.002$$

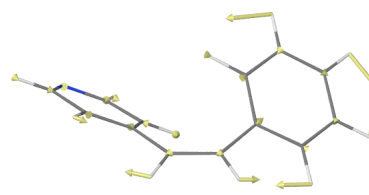

$$\nu_{40}(a) = 1180 \text{ cm}^{-1}$$

$$|Q_1| = 0.011 \text{ amu}^{1/2} \text{ \AA}$$

$$S_1 = 0.002$$

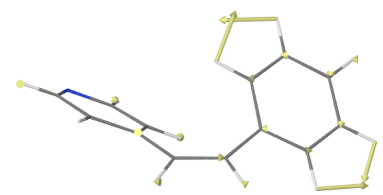

$$\nu_{41}(a) = 1201 \text{ cm}^{-1}$$

$$|Q_1| = 0.088 \text{ amu}^{1/2} \text{ \AA}$$

$$S_1 = 0.139$$

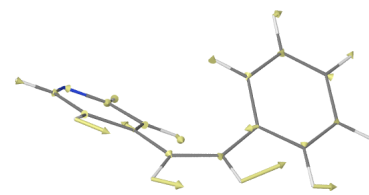

$$\nu_{42}(a) = 1229 \text{ cm}^{-1}$$

$$|Q_1| = 0.000 \text{ amu}^{1/2} \text{ \AA}$$

$$S_1 = 0.000$$

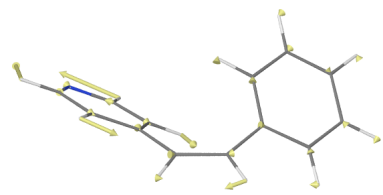

$$\nu_{43}(a) = 1244 \text{ cm}^{-1}$$

$$|Q_1| = 0.035 \text{ amu}^{1/2} \text{ \AA}$$

$$S_1 = 0.022$$

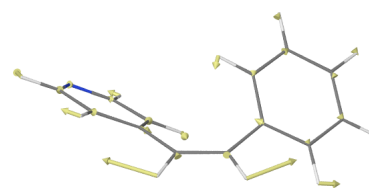

$$\nu_{44}(a) = 1261 \text{ cm}^{-1}$$

$$|Q_1| = 0.005 \text{ amu}^{1/2} \text{ \AA}$$

$$S_1 = 0.000$$

*To be continued ...*

Table S3: *continued.*

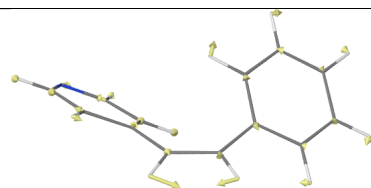

$$\nu_{45}(a) = 1311 \text{ cm}^{-1}$$

$$|Q_1| = 0.010 \text{ amu}^{1/2} \text{ \AA}$$

$$S_1 = 0.002$$

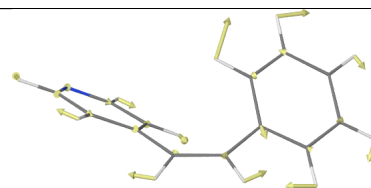

$$\nu_{46}(a) = 1344 \text{ cm}^{-1}$$

$$|Q_1| = 0.022 \text{ amu}^{1/2} \text{ \AA}$$

$$S_1 = 0.010$$

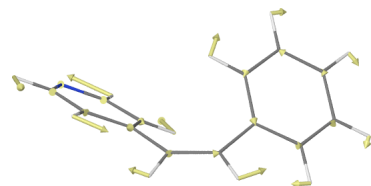

$$\nu_{47}(a) = 1358 \text{ cm}^{-1}$$

$$|Q_1| = 0.113 \text{ amu}^{1/2} \text{ \AA}$$

$$S_1 = 0.259$$

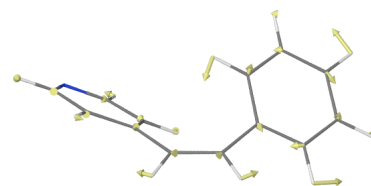

$$\nu_{48}(a) = 1362 \text{ cm}^{-1}$$

$$|Q_1| = 0.047 \text{ amu}^{1/2} \text{ \AA}$$

$$S_1 = 0.045$$

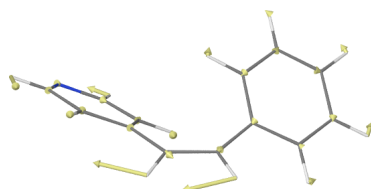

$$\nu_{49}(a) = 1432 \text{ cm}^{-1}$$

$$|Q_1| = 0.101 \text{ amu}^{1/2} \text{ \AA}$$

$$S_1 = 0.216$$

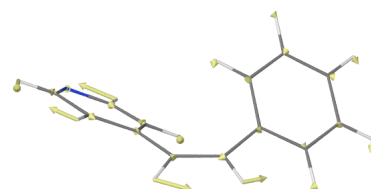

$$\nu_{50}(a) = 1446 \text{ cm}^{-1}$$

$$|Q_1| = 0.125 \text{ amu}^{1/2} \text{ \AA}$$

$$S_1 = 0.333$$

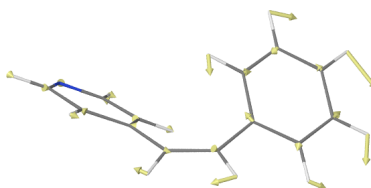

$$\nu_{51}(a) = 1471 \text{ cm}^{-1}$$

$$|Q_1| = 0.078 \text{ amu}^{1/2} \text{ \AA}$$

$$S_1 = 0.134$$

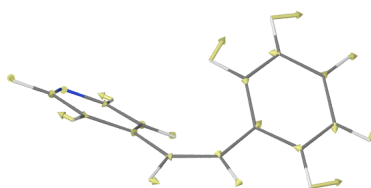

$$\nu_{52}(a) = 1515 \text{ cm}^{-1}$$

$$|Q_1| = 0.037 \text{ amu}^{1/2} \text{ \AA}$$

$$S_1 = 0.032$$

*To be continued ...*



Table S3: *continued.*

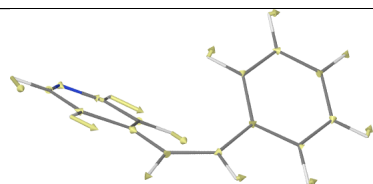

$$\nu_{53}(a) = 1525 \text{ cm}^{-1}$$

$$|Q_1| = 0.242 \text{ amu}^{1/2} \text{ \AA}$$

$$\mathcal{S}_1 = 1.322$$

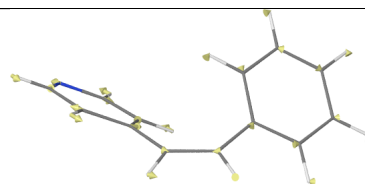

$$\nu_{54}(a) = 1596 \text{ cm}^{-1}$$

$$|Q_1| = 0.034 \text{ amu}^{1/2} \text{ \AA}$$

$$\mathcal{S}_1 = 0.028$$

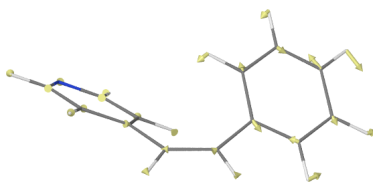

$$\nu_{55}(a) = 1618 \text{ cm}^{-1}$$

$$|Q_1| = 0.057 \text{ amu}^{1/2} \text{ \AA}$$

$$\mathcal{S}_1 = 0.077$$

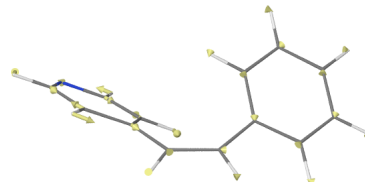

$$\nu_{56}(a) = 1637 \text{ cm}^{-1}$$

$$|Q_1| = 0.030 \text{ amu}^{1/2} \text{ \AA}$$

$$\mathcal{S}_1 = 0.021$$

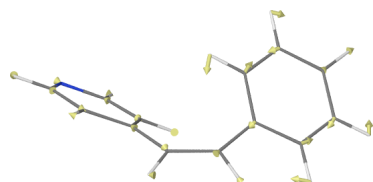

$$\nu_{57}(a) = 1647 \text{ cm}^{-1}$$

$$|Q_1| = 0.021 \text{ amu}^{1/2} \text{ \AA}$$

$$\mathcal{S}_1 = 0.011$$

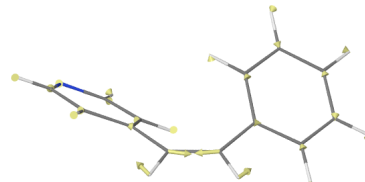

$$\nu_{58}(a) = 1682 \text{ cm}^{-1}$$

$$|Q_1| = 0.090 \text{ amu}^{1/2} \text{ \AA}$$

$$\mathcal{S}_1 = 0.201$$

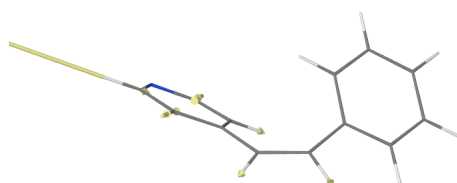

$$\nu_{59}(a) = 3158 \text{ cm}^{-1}$$

$$|Q_1| = 0.006 \text{ amu}^{1/2} \text{ \AA}$$

$$\mathcal{S}_1 = 0.001$$

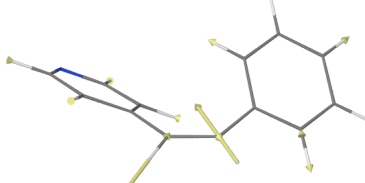

$$\nu_{60}(a) = 3164 \text{ cm}^{-1}$$

$$|Q_1| = 0.002 \text{ amu}^{1/2} \text{ \AA}$$

$$\mathcal{S}_1 = 0.000$$

*To be continued ...*

Table S3: *continued.*

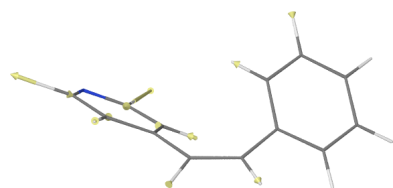

$$\nu_{61}(a) = 3165 \text{ cm}^{-1}$$

$$|Q_1| = 0.028 \text{ amu}^{1/2} \text{ \AA}$$

$$\mathcal{S}_1 = 0.036$$

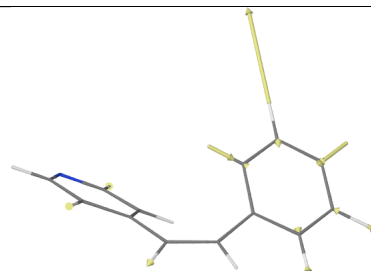

$$\nu_{62}(a) = 3181 \text{ cm}^{-1}$$

$$|Q_1| = 0.020 \text{ amu}^{1/2} \text{ \AA}$$

$$\mathcal{S}_1 = 0.019$$

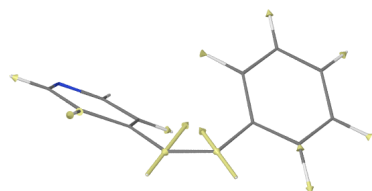

$$\nu_{63}(a) = 3185 \text{ cm}^{-1}$$

$$|Q_1| = 0.013 \text{ amu}^{1/2} \text{ \AA}$$

$$\mathcal{S}_1 = 0.008$$

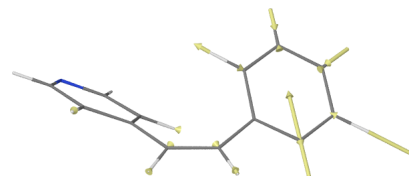

$$\nu_{64}(a) = 3195 \text{ cm}^{-1}$$

$$|Q_1| = 0.012 \text{ amu}^{1/2} \text{ \AA}$$

$$\mathcal{S}_1 = 0.007$$

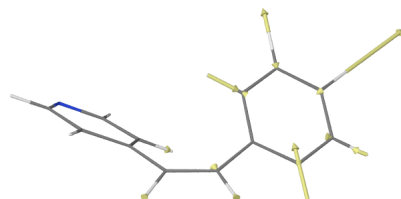

$$\nu_{65}(a) = 3202 \text{ cm}^{-1}$$

$$|Q_1| = 0.020 \text{ amu}^{1/2} \text{ \AA}$$

$$\mathcal{S}_1 = 0.019$$

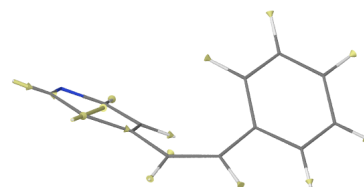

$$\nu_{66}(a) = 3208 \text{ cm}^{-1}$$

$$|Q_1| = 0.044 \text{ amu}^{1/2} \text{ \AA}$$

$$\mathcal{S}_1 = 0.094$$

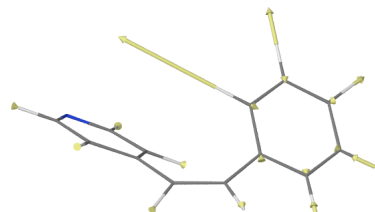

$$\nu_{67}(a) = 3210 \text{ cm}^{-1}$$

$$|Q_1| = 0.087 \text{ amu}^{1/2} \text{ \AA}$$

$$\mathcal{S}_1 = 0.363$$

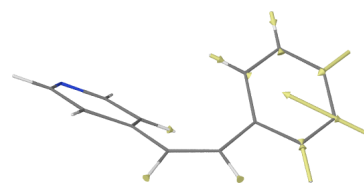

$$\nu_{68}(a) = 3221 \text{ cm}^{-1}$$

$$|Q_1| = 0.048 \text{ amu}^{1/2} \text{ \AA}$$

$$\mathcal{S}_1 = 0.108$$

*To be continued ...*

---

Table S3: *continued.*

---

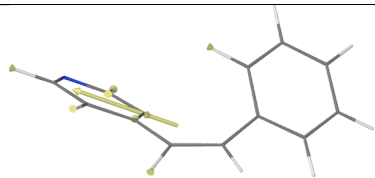

$$\nu_{69}(a) = 3242 \text{ cm}^{-1}$$

$$|Q_1| = 0.086 \text{ amu}^{1/2} \text{ \AA}$$

$$\mathcal{S}_1 = 0.354$$

---
